# Supplementary material
Source: publisher site journal article supplement (https://www.dovepress.com/article/334574)
Supplement: Supplementary file 1 [file get_supplementary_file.php]

Aim of this survey:

The aim is to simply find out whether or not people of Black African or Afro-Caribbean heritage experience sunburn. The results will be submitted for publication in a scientific journal in order to ensure that the body of existing scientific literature on this topic includes a diverse range of people. Your answers are anonymous and you can request the results of this survey by sending us an email.

1. Do you consider yourself to be Black and/or Mixed Race?
   1. Yes
   2. No
2. Which option best applies to you?
   1. Both of my biological parents are Black
   2. One of my parentis is Black. My other parent is Mixed Race and has one Black parent
   3. One of my biological parents is Black and the other is from a different racial group
   4. Both of my biological parents are Mixed Race and both of my parents have one parent who is Black
   5. One of my biological grandparents is Black and the rest are not
   6. Other
3. How would you describe your ethnic heritage (eg “I am Bajan” “My mother is Ghanaian and my father is Kenyan” “My mother is Scottish and my father is Zambian”)
4. What is your sex? (eg female)
5. How old are you (years)?
   1. 10-19
   2. 20-29
   3. 30-39
   4. 40-49
   5. 50-59
   6. 60-69
   7. Over 70
6. How would you describe your skin complexion?
   1. Dark
   2. Medium
   3. Light
7. Where do you live? (eg UK, US, South Africa etc)
8. Have you ever lived in a hot country for longer than a year?
   1. Yes
   2. No
9. How many times have you been sunburnt in your life? (symptoms include pain, blisters, skin peeling and redness)
   1. 0
   2. 1
   3. 2
   4. 3
   5. 4
   6. 5
   7. Over 5 times
10. If you have been sunburnt, were you wearing sunscreen at the time? (Please skip this question if you have never sunburned before)
    1. Yes
    2. No
    3. Can’t remember
11. If you have been sunburnt, can you give an account of the circumstances (eg “I was on holiday in Greece and sunbathing on the beach” or “I was in the UK during summer”)
12. Any comments:

Thank you for completing this survey!
